# Supplementary material
Source: HighWire-hosted journal article supplement (https://bmjopen.bmj.com/content/9/6/e026140)
Supplement: inline-supplementary-material-1 [file inline-supplementary-material-1.pdf]

Date: \_\_\_\_/\_\_\_\_/\_\_\_\_

Research Institute of Disaster Management and EMS,  
Kokushikan University

### Survey

We conduct this survey for those who had a CPR training. Thank you for your cooperation to take part in this survey. The result will only use for a research purpose and will be kept in the strictest confidentiality. Please make a circle (o) or fill in the blank.

1. Number of mannikin: \_\_\_\_\_

2. Sex: male / female

3. Age: \_\_\_\_\_ years old      height: \_\_\_\_\_ cm      weight: \_\_\_\_\_ kg

4. Have you ever taken CPR training course?    Yes / No

5. if "Yes" on question 4, did you take within a year?    Yes / No

**Question 6: On a scale 1 to 10, with 1 being very difficult and 10 being very easy, ...**

**6. How do you rate the ease of understanding the feedback from instructor?**

|            |                      |   |   |   |   |   |   |   |   |   |    |                  |
|------------|----------------------|---|---|---|---|---|---|---|---|---|----|------------------|
| (1) rate   | (1 = very difficult) | 1 | 2 | 3 | 4 | 5 | 6 | 7 | 8 | 9 | 10 | (10 = very easy) |
| (2) depth  | (1 = very difficult) | 1 | 2 | 3 | 4 | 5 | 6 | 7 | 8 | 9 | 10 | (10 = very easy) |
| (3) recoil | (1 = very difficult) | 1 | 2 | 3 | 4 | 5 | 6 | 7 | 8 | 9 | 10 | (10 = very easy) |

**Question 7 & 8: On a scale 1 to 10, with 1 being not confident and 10 being very confident, ...**

**7. How much confidence do you have to perform chest compression before training?**

|            |                     |   |   |   |   |   |   |   |   |   |    |                       |
|------------|---------------------|---|---|---|---|---|---|---|---|---|----|-----------------------|
| (1) rate   | (1 = not confident) | 1 | 2 | 3 | 4 | 5 | 6 | 7 | 8 | 9 | 10 | (10 = very confident) |
| (2) depth  | (1 = not confident) | 1 | 2 | 3 | 4 | 5 | 6 | 7 | 8 | 9 | 10 | (10 = very confident) |
| (3) recoil | (1 = not confident) | 1 | 2 | 3 | 4 | 5 | 6 | 7 | 8 | 9 | 10 | (10 = very confident) |

**8. How much confidence do you have to perform chest compression after training?**

|            |                     |   |   |   |   |   |   |   |   |   |    |                       |
|------------|---------------------|---|---|---|---|---|---|---|---|---|----|-----------------------|
| (1) rate   | (1 = not confident) | 1 | 2 | 3 | 4 | 5 | 6 | 7 | 8 | 9 | 10 | (10 = very confident) |
| (2) depth  | (1 = not confident) | 1 | 2 | 3 | 4 | 5 | 6 | 7 | 8 | 9 | 10 | (10 = very confident) |
| (3) recoil | (1 = not confident) | 1 | 2 | 3 | 4 | 5 | 6 | 7 | 8 | 9 | 10 | (10 = very confident) |

**9. Please feel free to comments**
